# Supplementary material
Source: MDPI journal article supplement (https://www.mdpi.com/0718-1876/16/7/176)
Supplement: s1 [file s1]

**Proof of Lemma 1:** Consumer's indifferent point of buying with mobile coupons or not is  $x' = \frac{V - p + m}{t}$ , so the targeted segment is between  $x$  and  $x'$ , and has a size of  $\frac{m}{t}$ . By maximizing the firm's profit function  $px + (p - m - c)(x' - x)$ , we obtain

$p^* = \frac{2V - c}{3}$ ,  $m^* = \frac{V - 2c}{3}$ ,  $x = \frac{V + c}{3t}$ ,  $x' = \frac{2V - c}{3t}$ , and  $\pi^* = \frac{V^2 - Vc + c^2}{3t}$ , where  $c < \frac{V}{2}$  and  $\frac{2V - c}{3t} < 1$ . For  $c < \frac{V}{2}$  and  $t > \frac{2V - c}{3}$ , we have

$$(a) \quad \pi^*|_{target} = \frac{V^2 - Vc + c^2}{3t} > \pi^*|_{non-target} = \frac{V^2}{4t};$$

$$(b) \quad p^*|_{target} = \frac{2V - c}{3} > p^*|_{non-target} = \frac{V}{2} \quad \text{and the non-targeted area shrinks for} \\ \frac{V + c}{3t} < \frac{V}{2t};$$

$$(c) \quad d^*|_{target} = \frac{2V - c}{3t} > d^*|_{non-target} = \frac{V}{2t}.$$

**Proof of Lemma 2:** Comparing the equilibrium profits between subgames  $(NC, NC)$  and  $(C, NC)$ , which are given in Tables 2 and 3, respectively, we have

(a)  $\pi_1^*|_{(C,N)} > \pi_1^*|_{(N,N)}$  always holds if the conditions on the degree of competition and the cost structure are satisfied in Table 3.

(b) For  $\frac{V}{t} \in (0, \frac{6}{7})$  and  $c \in (0, \frac{V}{2})$ , and  $\frac{V}{t} \in [\frac{6}{7}, \frac{6}{5}]$   $c \in (0, \frac{t}{2})$ , we have

$$\pi_2^*|_{(C,N)} = \pi_2^*|_{(N,N)}.$$

(c) For  $\frac{V}{t} \in (\frac{6}{5}, \frac{3}{2})$  and  $c \in (0, 3t - 2V)$ , we have  $\pi_2^*|_{(C,N)} < \pi_2^*|_{(N,N)}$ .

**Proof of Corollary 1:** Comparing the prices of firm 2 that does not adopt LBMC promotion between subgames  $(N, N)$  and  $(NC, N)$  under the same degree of competition,

for  $\frac{V}{t} \in (\frac{6}{7}, 1)$  and  $\frac{V}{t} \in (\frac{6}{5}, \frac{3}{2})$ , we have  $p_2^*|_{(C,N)} < p_2^*|_{(N,N)}$ . This implies that unilateral

adoption of LBMC promotion, e.g., only firm 1 adopts mobile coupons leads to firm 2 having a lower price, which results in a fiercer competition in the market.

**Proof of Lemma 3:** Comparing the equilibrium profits of subgames  $(NC, NC)$  and  $(C, C)$ , which are given in Tables 2 and 4, respectively, we have  $\pi_i^*|_{(C,C)} > \pi_i^*|_{(N,N)}$ . Comparing the profits between subgames  $(C, C)$  and  $(C, NC)$ , we have  $\pi_2^*|_{(C,C)} > \pi_2^*|_{(C,N)}$ .

**Proof of Proposition 1:** Comparing the equilibrium profits among subgames  $(NC, NC)$ ,  $(C, NC)$ ,  $(NC, C)$ , and  $(C, C)$ , we have  $\pi_1^*|_{(C,N)} > \pi_1^*|_{(N,N)}$  and  $\pi_2^*|_{(N,C)} > \pi_2^*|_{(N,N)}$ , which motive both firms to adopt LBMC promotion. Furthermore, we have  $\pi_1^*|_{(C,C)} > \pi_1^*|_{(C,N)}$  when  $\frac{V}{t} \in (0, \frac{6}{5}]$  and  $\pi_1^*|_{(C,C)} = \pi_1^*|_{(C,N)}$  when  $\frac{V}{t} \in (\frac{6}{5}, +\infty)$ , i.e., if firm 1's profit is no worse off while firm 2 adopts LBMC promotion. In conclusion, strategy  $(C, C)$  is an SPNE as long as the properties of the cost structure are fulfilled under each scenario. Otherwise, strategy  $(NC, NC)$  is an SPNE.
